# Supplementary material for: NMR Relaxivities of Paramagnetic Lanthanide-Containing Polyoxometalates
Source: MDPI journal article supplement (doi:10.3390/molecules26247481), 2021-12-10
Supplement: s1 [file s1]

## **Electronic Supplementary Information (ESI)**

### **NMR Relaxivities of Paramagnetic Lanthanide-Containing Polyoxometalates**

Aiswarya Chalikunnath Venu<sup>1</sup>, Rami Nasser Din<sup>2</sup>, Thomas Rudszuck<sup>3</sup>, Pierre Picchetti<sup>1</sup>, Papri Chakraborty<sup>1</sup>, Annie K. Powell<sup>1,4,5\*</sup>, Steffen Krämer<sup>2\*</sup>, Gisela Guthausen<sup>3,6\*</sup>, Masooma Ibrahim<sup>1\*</sup>

## Experimental

### Materials and methods

**Synthesis:** The lanthanide-containing polyoxometalates (POMs),  $K_5[Dy(H_2O)_4GeW_{11}O_{39}] \cdot 16H_2O$  (Dy-W<sub>11</sub>),  $K_5[Er(H_2O)_3GeW_{11}O_{39}] \cdot 20H_2O$  (Er-W<sub>11</sub>) [1], and  $(NH_2Me_2)_{13}Na_3[\{Er(H_2O)(CH_3COO)(P_2W_{17}O_{61})\}_2] \cdot 40 H_2O$  (**Er<sub>2</sub>-W<sub>34</sub>**) [ $\{Er^{III}(H_2O)(CH_3COO)(P_2W_{17}O_{61})\}_2\}^{16-}$  (**Er<sub>2</sub>-W<sub>34</sub>**) [2] were synthesized according to the literature methods and was characterized by FTIR spectroscopy. Xylenol Orange solution was prepare in 0.5 M LiOAc/HOAc buffer (pH 5.6) with slight modification from literature method [3]. All reactions were carried out under aerobic conditions. All other reagents were commercially purchased and were used without further purification.

**Electrospray ionization mass spectrometry (ESI MS):** The solution and gas phase behavior of **Er<sub>2</sub>-W<sub>34</sub>** was studied using electrospray ionization mass spectrometry (ESI MS). A Waters Synapt G2S system was used for this purpose and the samples were measured in the negative ion mode. 0.2 mM solution from NMR tube were further diluted with acetonitrile (ACN) and H<sub>2</sub>O at the 50:50 (v/v) ratio.

**Dynamic Light Scattering (DLS) Measurements:** DLS measurements were performed by using a Malvern ZetaSizer nano device. Prior to measurement, samples were filtered through a syringe filter (0.22  $\mu$ m, polypropylene membrane). The intensity of the scattered light was measured at a fixed angle (173°), while the laser light wavelength for the scattering experiments was  $\lambda=633$  nm. The refractive index for POMs was 1.55. Data analysis was performed according to standard procedures by using the Malvern software. Briefly, the decay rates were determined by the following relationship, where  $\eta$  is the viscosity of the medium (water),  $D_h$  is the hydrodynamic diameter, and  $\theta$  is the scattering angle.

$$\Gamma = D_h \cdot \left( \frac{4\pi\eta}{\lambda} \cdot \sin\left(\frac{\theta}{2}\right) \right)^2$$

To fit the autocorrelation function, the non-negatively constrained least squares (NNLS) algorithm built into the software was used, which allows for the determination of the diffusion coefficient ( $D$ ), from which the hydrodynamic diameter of the particles is calculated by using the Stokes-Einstein equation (see below), where  $k_b$  is the Boltzmann constant,  $T$  is the temperature, and  $\eta$  is the viscosity of the medium (water).

$$D_h = \frac{k_b \cdot T}{3 \cdot \pi \cdot \eta \cdot d}$$

Zeta-potential measurements were performed by using the Malvern ZetaSizer nano device and analyzed according to standard procedures using Malvern software.

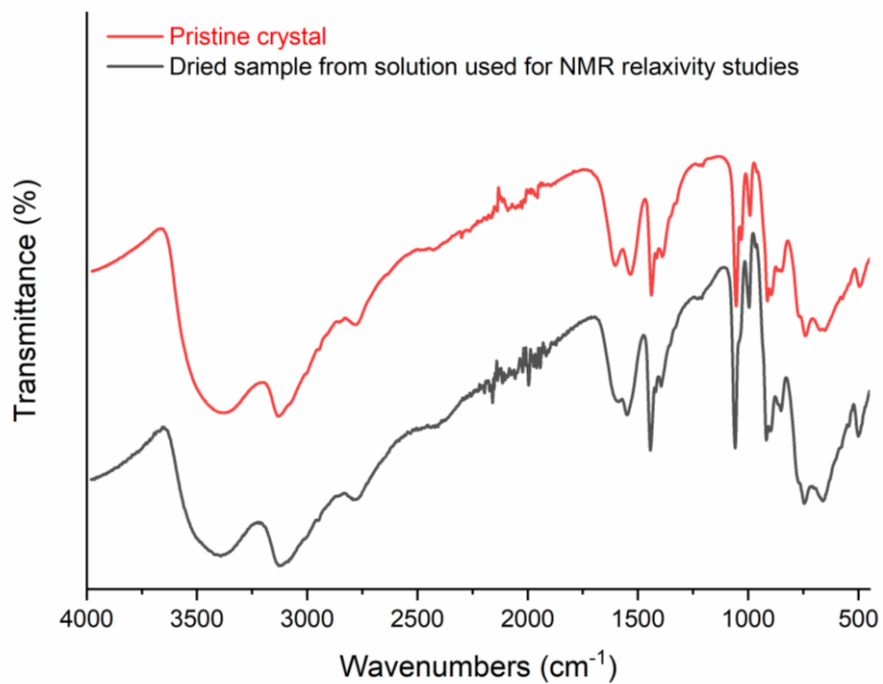

**Figure S1.** Comparison of FTIR spectra of **Er<sub>2</sub>-W<sub>34</sub>**: Pristine crystals (red) and dried sample obtained from solution used for NMR relaxivity measurement (black).

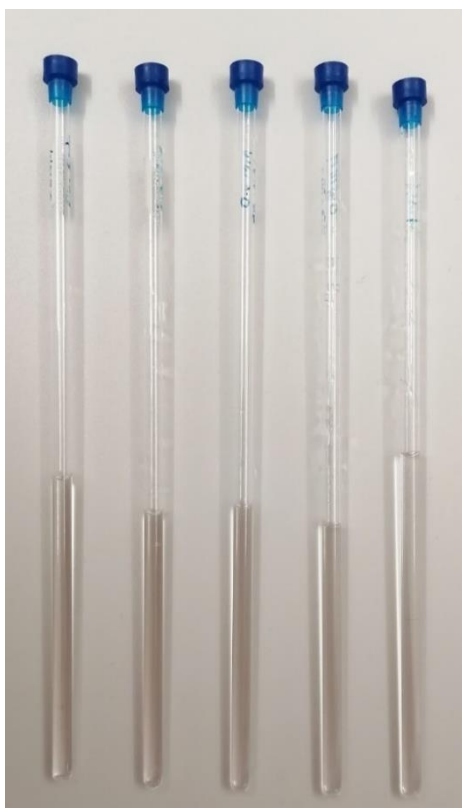

**Figure S2.** Pictures of NMR tubes containing **Er<sub>2</sub>-W<sub>34</sub>** solution after NMR relaxivity studies.

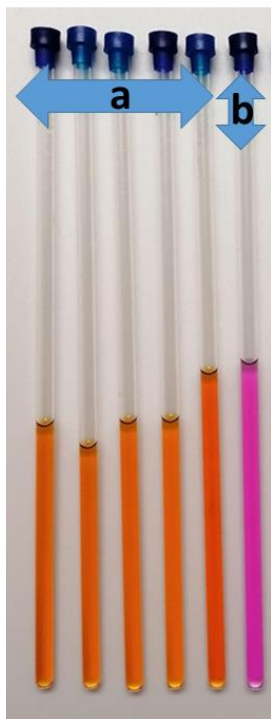

**Figure S3.** Pictures of NMR tubes: Upon addition of xlenol orange solution to the **Er<sub>2</sub>-W<sub>34</sub>** solution after NMR relaxivity studies (a) Upon addition of xlenol orange solution to the **Er<sub>2</sub>-W<sub>34</sub>** solution containing ca. 0.2 mg of Er(NO<sub>3</sub>)<sub>3</sub>·6H<sub>2</sub>O.

**Table S1.** Magnetic properties of isolated lanthanide ions

| <b>Ln<sup>III</sup></b> | 4f <sup>n</sup> electron configuration | Free-ion ground state term <sup>2S+1</sup> L <sub>J</sub> | Free-ion g value | $\mu_{eff} = gJ\mu_B\sqrt{J(J+1)}$ | 8-coordinate radius | 4f electron density distribution's geometry | Free-ion $\chi_m T_{calc}$ value at RT (cm <sup>3</sup> K mol <sup>-1</sup> ) |
|-------------------------|----------------------------------------|-----------------------------------------------------------|------------------|------------------------------------|---------------------|---------------------------------------------|-------------------------------------------------------------------------------|
| <b>La</b>               | 4f <sup>0</sup>                        | <sup>1</sup> S <sub>0</sub>                               | -----            | -----                              | 1.16                | -----                                       | 0                                                                             |
| <b>Ce</b>               | 4f <sup>1</sup>                        | <sup>2</sup> F <sub>5/2</sub>                             | 6/7              | 2.54                               | 1.14                | Oblate                                      | 0.80                                                                          |
| <b>Pr</b>               | 4f <sup>2</sup>                        | <sup>3</sup> H <sub>4</sub>                               | 4/5              | 3.58                               | 1.13                | Oblate                                      | 1.60                                                                          |
| <b>Nd</b>               | 4f <sup>3</sup>                        | <sup>4</sup> I <sub>9/2</sub>                             | 8/11             | 3.68                               | 1.11                | Oblate                                      | 1.64                                                                          |
| <b>Pm</b>               | 4f <sup>4</sup>                        | <sup>5</sup> I <sub>4</sub>                               | 3/5              | 2.68                               | 1.09                | Prolate                                     | 0.90                                                                          |
| <b>Sm</b>               | 4f <sup>5</sup>                        | <sup>6</sup> H <sub>5/2</sub>                             | 2/7              | 0.85                               | 1.08                | Prolate                                     | 0.09                                                                          |
| <b>Eu</b>               | 4f <sup>6</sup>                        | <sup>7</sup> F <sub>0</sub>                               | -----            | -----                              | 1.07                | Isotropic                                   | 0                                                                             |
| <b>Gd</b>               | 4f <sup>7</sup>                        | <sup>8</sup> S <sub>7/2</sub>                             | 2                | 7.94                               | 1.05                | Isotropic                                   | 7.88                                                                          |
| <b>Tb</b>               | 4f <sup>8</sup>                        | <sup>7</sup> F <sub>6</sub>                               | 3/2              | 9.7                                | 1.04                | Oblate                                      | 11.82                                                                         |
| <b>Dy</b>               | 4f <sup>9</sup>                        | <sup>6</sup> H <sub>15/2</sub>                            | 4/3              | 10.6                               | 1.03                | Oblate                                      | 14.17                                                                         |
| <b>Ho</b>               | 4f <sup>10</sup>                       | <sup>5</sup> H <sub>8</sub>                               | 5/4              | 10.6                               | 1.02                | Oblate                                      | 14.07                                                                         |
| <b>Er</b>               | 4f <sup>11</sup>                       | <sup>4</sup> I <sub>15/2</sub>                            | 6/5              | 9.6                                | 1.00                | Prolate                                     | 11.48                                                                         |
| <b>Tm</b>               | 4f <sup>12</sup>                       | <sup>3</sup> H <sub>6</sub>                               | 7/6              | 7.6                                | 0.99                | Prolate                                     | 7.15                                                                          |
| <b>Yb</b>               | 4f <sup>13</sup>                       | <sup>2</sup> F <sub>7/2</sub>                             | 8/7              | 4.5                                | 0.99                | Prolate                                     | 2.57                                                                          |
| <b>Lu</b>               | 4f <sup>14</sup>                       | <sup>1</sup> S <sub>0</sub>                               | -----            | -----                              | 0.98                | Isotropic                                   | 0                                                                             |

$g_J = 3/2 + [S(S+1) - L(L+1)]/2J(J+1)$  (Landé factor,  $g_J$  is the g-factor for a spin and orbital factors taken together).

$\chi_m T_{calc} = g^2/8 * J(J+1)$ .

RT = room temperature.

$\chi_m$  = molar magnetic susceptibility

$\tau_e$  = relaxation time

$\mu_B$  = Bohr magneton

$\mu_{eff}$  = effective Bohr magneton number

## References

1. Ibrahim, M.; Mbomekallé, I.M.; de Oliveira, P.; Baksi, A.; Carter, A.B.; Peng, Y.; Bergfeldt, T.; Malik, S.; Anson, C.E. Syntheses, crystal structure, electrocatalytic, and magnetic properties of the monolanthanide-containing germanotungstates  $[\text{Ln}(\text{H}_2\text{O})_n\text{GeW}_{11}\text{O}_{39}]^{5-}$  ( $\text{Ln} = \text{Dy}, \text{Er}$ ,  $n = 4, 3$ ). *ACS Omega*. **2019**, *4*, 21873–21882.
2. Ibrahim, M.; Baksi, A.; Peng, Y.; Al-zeidaneen, F.K.; Mbomekall, I.M.; Oliveira, P. De; Anson, C.E. Synthesis, characterization, electrochemistry, photoluminescence and magnetic properties of a dinuclear erbium(III)-containing monolacunary Dawson-type tungstophosphate:  $[\{\text{Er}(\text{H}_2\text{O})(\text{CH}_3\text{COO})(\text{P}_2\text{W}_{17}\text{O}_{61})\}_2]^{16-}$ . *Molecules*. **2020**, *25*, 4229.
3. Barge, A.; Cravotto, G.; Gianolio, E.; Fedeli, F. How to determine free Gd and free ligand in solution of Gd chelates. A technical note. *Contrast Media Mol. Imaging* **2006**, *1*, 184–188.
